# Supplementary material
Source: Springer Nature journal article supplement (https://www.springermedizin.de/resource/supplementary/12889_2014_7430_MOESM1_ESM.pdf/9497482)
Supplement: MOESM1 [file 9497482]

# Socioeconomic differences in the use of ill-defined causes of death in 16 European countries

Ivana Kulhánová<sup>1,\*</sup>, Gwenn Menvielle<sup>2,3</sup>, Matthias Bopp<sup>4</sup>, Carme Borrell<sup>5</sup>, Patrick Deboosere<sup>6</sup>, Terje A. Eikemo<sup>1,7</sup>, Rasmus Hoffmann<sup>1</sup>, Mall Leinsalu<sup>8,9</sup>, Pekka Martikainen<sup>10</sup>, Enrique Regidor<sup>11</sup>, Maica Rodríguez-Sanz<sup>5</sup>, Jitka Rychtaříková<sup>12</sup>, Bogdan Wojtyniak<sup>13</sup>, Johan P. Mackenbach<sup>1</sup>

<sup>1</sup> Department of Public Health, Erasmus MC, University Medical Center Rotterdam, P.O. Box 2040, 3000 CA Rotterdam, The Netherlands

<sup>2</sup> INSERM, UMR\_S 1136, Pierre Louis Institute of Epidemiology and Public Health, 75013, Paris, France

<sup>3</sup> Sorbonne Universités, UPMC Univ Paris 06, UMR\_S 1136, Pierre Louis Institute of Epidemiology and Public Health, 75013, Paris, France

<sup>4</sup> Institute of Social and Preventive Medicine, University of Zürich, Zürich, Switzerland

<sup>5</sup> Agència de Salut Pública de Barcelona, Barcelona, Spain

<sup>6</sup> Department of Sociology, Vrije Universiteit Brussel, Brussels, Belgium

<sup>7</sup> Department of Sociology and Political Science, Norwegian University of Science and Technology, Trondheim, Norway

<sup>8</sup> Stockholm Centre on Health of Societies in Transition, Södertörn University, Huddinge, Sweden

<sup>9</sup> Department of Epidemiology and Biostatistics, National Institute for Health Development, Tallinn, Estonia

<sup>10</sup> Department of Sociology, University of Helsinki, Helsinki, Finland

<sup>11</sup> Department of Preventive Medicine and Public Health, Universidad Complutense de Madrid, Madrid, Spain

<sup>12</sup> Department of Demography and Geodemography, Faculty of Science, Charles University in Prague, Prague, Czech Republic

<sup>13</sup> Department-Centre for Monitoring and Analyses of Population Health Status and Health Care System, National Institute of Public Health – National Institute of Hygiene, Warsaw, Poland

\* Corresponding author: [i.kulhanova@erasmusmc.nl](mailto:i.kulhanova@erasmusmc.nl)

**BMC PUBLIC HEALTH – ELECTRONIC SUPPLEMENTARY MATERIAL**

**Table S1: Mortality data sources**

| <b>Population</b>          | <b>Type of dataset</b> | <b>Period</b> | <b>Geographic coverage</b> | <b>Demographic coverage</b>                                 | <b>Number of person-years<sup>#</sup></b> | <b>Number of deaths<sup>#</sup></b> |
|----------------------------|------------------------|---------------|----------------------------|-------------------------------------------------------------|-------------------------------------------|-------------------------------------|
| <b>Finland</b>             | longitudinal           | 2001–2007     | national                   | 20% of Finns are excluded (at random)                       | 16,384,591                                | 145,795                             |
| <b>Sweden</b>              | longitudinal           | 2001–2006     | national                   | whole population                                            | 29,781,132                                | 214,300                             |
| <b>Norway</b>              | longitudinal           | 2001–2006     | national                   | whole population                                            | 12,309,468                                | 83,343                              |
| <b>Denmark</b>             | longitudinal           | 2001–2005     | national                   | whole population                                            | 15,209,876                                | 134,925                             |
| <b>England &amp; Wales</b> | longitudinal           | 2001–2006     | national                   | 1% of the population                                        | 1,518,487                                 | 13,124                              |
| <b>Netherlands</b>         | longitudinal           | 1998–2007     | national                   | linkage based on the Labour Force Survey                    | 1,802,289                                 | 9,875                               |
| <b>Belgium</b>             | longitudinal           | 2004–2005     | national                   | whole population                                            | 11,946,186                                | 94,551                              |
| <b>France</b>              | longitudinal           | 1999–2005     | national                   | 1% of the population, born outside France mainland excluded | 1,626,611                                 | 12,270                              |
| <b>Switzerland</b>         | longitudinal           | 2001–2005     | national                   | Non-Swiss nationals excluded                                | 16,448,691                                | 92,656                              |
| <b>Austria</b>             | longitudinal           | 2001–2002     | national                   | whole population                                            | 4,872,243                                 | 39,690                              |
| <b>Barcelona</b>           | repeated CS            | 2000–2006     | city                       | whole population                                            | 7,387,813                                 | 52,444                              |
| <b>Basque</b>              | longitudinal           | 2001–2006     | region                     | whole population                                            | 6,722,857                                 | 46,277                              |
| <b>Madrid</b>              | longitudinal           | 2001–2003     | region                     | whole population                                            | 5,216,958                                 | 36,526                              |
| <b>Turin</b>               | longitudinal           | 2001–2006     | city                       | whole population                                            | 2,615,579                                 | 21,188                              |
| <b>Tuscany</b>             | longitudinal           | 2001–2005     | Florence, Leghorn, Prato   | whole population                                            | 1,559,031                                 | 12,263                              |
| <b>Hungary</b>             | CS unlinked            | 1999–2002     | national                   | whole population                                            | 23,834,776                                | 371,492                             |
| <b>Czech Republic</b>      | CS unlinked            | 1999–2003     | national                   | whole population                                            | 29,122,645                                | 348,019                             |
| <b>Poland</b>              | CS unlinked            | 2001–2003     | national                   | whole population                                            | 62,078,814                                | 726,093                             |
| <b>Estonia</b>             | CS unlinked            | 1998–2002     | national                   | whole population                                            | 3,873,395                                 | 61,918                              |

<sup>#</sup> age range 30–79 years

CS = cross-sectional
